# Supplementary material for: Outcomes of allogeneic hematopoietic stem cell transplantation for relapsed or refractory diffuse large B-cell lymphoma
Source: Research Square preprint supplement (doi:10.21203/rs.3.rs-3129522/v1), 2023-07-13
Supplement: Supplementary file 1 [file 2a2a6fe9a6a91a80ddae2a8a.xlsx]

## Sheet: Sheet1
Table 1. Patients' characteristics
Variables	Number of patients (n = 1,268)
Median patient age at allo-HSCT, years (range)	53 (16-73)
Sex
Male	732 (57.8%)
Female	535 (42.2%)
Stage at diagnosis
I	72 (5.7%)
II	201 (15.9%)
III	202 (16.0%)
IV	787 (62.4%)
B symptom at diagnosis
No	775 (62.1%)
Yes	472 (37.9%)
International prognostic index at diagnosis
Low	305 (25.4%)
Low-intermediate	368 (30.7%)
High-intermediate	346 (28.9%)
High	180 (15.0%)
Median time from diagnosis to allo-HSCT, days (range)	567 (27-8342)
Years from diagnosis to transplantation
< 1 year	890 (70.2%)
> 1 year	378 (29.8%)
Previous HSCT
Auto-HSCT	489 (38.7%)
Allo-HSCT	73 (5.8%)
No history of transplantaion	702 (55.5%)
Years from previous transplantation
< 1 year	298 (53.2%)
> 1 year	262 (46.8%)
Disease status at transplantation
CR	334 (26.4%)
Non-CR	931 (73.6%)
Disease status at transplantation
CR, PR	733 (57.9%)
SD, PD	532 (42.1%)
Performance status
0-1	972 (77.3%)
> 2	285 (22.7%)
HCT-CI at transplantation
0-2	827 (72.9%)
> 2	307 (27.1%)
Conditioning regimen
RIC	768 (60.6%)
FIC	500 (39.4%)
Conditioning regimen with TBI
No	514 (40.5%)
Yes	754 (59.5%)
Conditioning regimen with Rituximab
No	1199 (94.6%)
Yes	69 (5.4%)
Donor source
Related BM or PB	521 (41.0%)
Unrelated BM or PB	310 (24.5%)
Cord blood	437 (34.5%)
HLA-matched
Yes	339 (30.8%)
No	672 (69.2%)
Sex of donor
Male	674 (56.8%)
Female	513 (43.2%)
